# Supplementary material for: CO2 reduction to CH4 on Cu-doped phosphorene: a first-principles study
Source: Royal Society of Chemistry journal article supplement (doi:10.1039/d1nr06066j), 2021-01-01
Supplement: d1nr06066j1.pdf [file d1nr06066j1.pdf]

## **CO<sub>2</sub> Reduction on Phosphorene and Cu-doped Phosphorene: A first-principles study**

Hong-ping Zhang <sup>a</sup>, Run Zhang <sup>a</sup>, Chenghua Sun <sup>b</sup>, Yan Jiao <sup>c\*</sup>, Yaping Zhang <sup>a\*</sup>

<sup>a</sup> State Key Laboratory of Environmental Friendly Energy Materials, Engineering Research Center of Biomass Materials, Ministry of Education, School of Materials Science and Engineering, Southwest University of Science and Technology, Sichuan 621010, China.

<sup>b</sup> Department of Chemistry and Biotechnology, and Center for Translational Atomaterials, Faculty of Science Engineering & Technology, Swinburne University of Technology, Hawthorn, Victoria, 3122 Australia.

<sup>c</sup> School of Chemical Engineering and Advanced Materials, The University of Adelaide, South Australia 5005, Australia.

\* Corresponding author. Tel: +86-816-6089009, E-mail: [yapingzhang@swust.edu.cn](mailto:yapingzhang@swust.edu.cn) (Y. P. Zhang) and Tel: +61 8 8313 0753, E-mail: [yan.jiao@adelaide.edu.au](mailto:yan.jiao@adelaide.edu.au) (Y. Jiao)

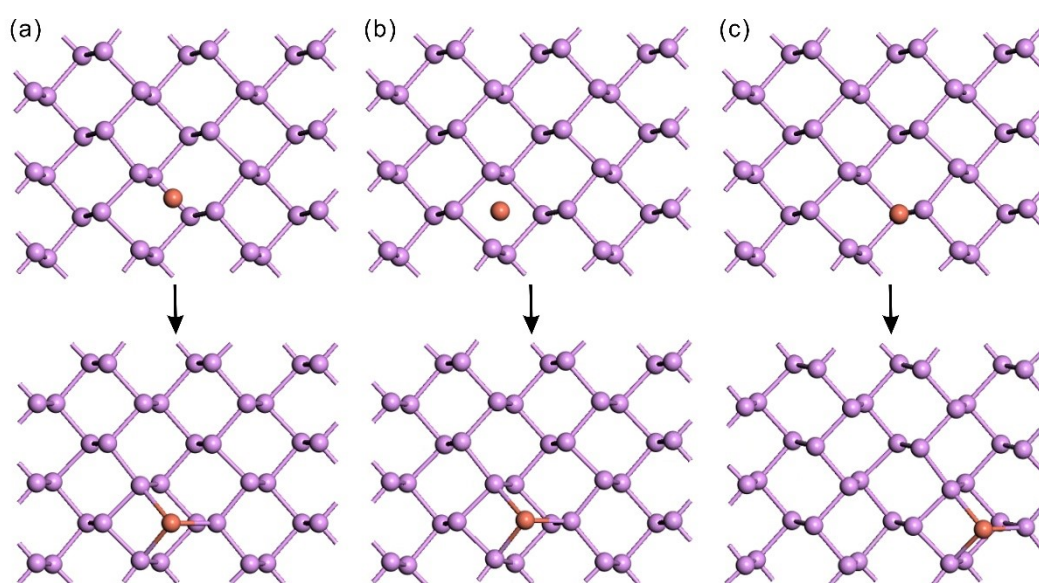

Figure S1. The initial and optimized configurations of different Cu doped phosphorenes: (a) the bridging site, (b) the hollow site and (c) the on-top site. (Colors: purple, phosphorous atom; rust red, Cu atom)

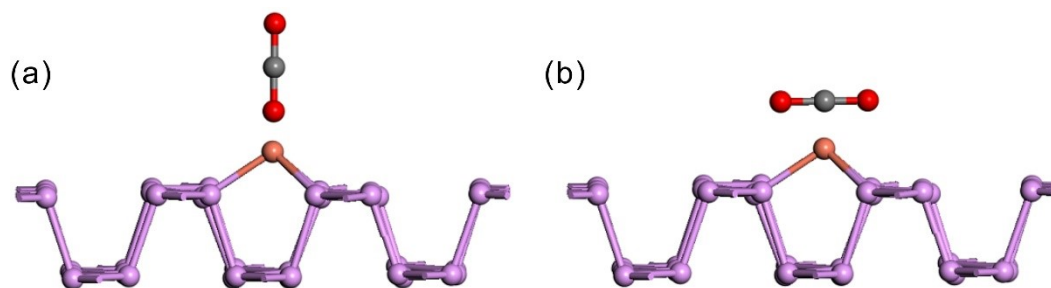

Figure S2. Two different interaction modes of  $\text{CO}_2$  on Cu-doped phosphorene: (a) with one O atom pointing to the dopant, (b)  $\text{CO}_2$  paralleling to the Cu-doped phosphorene.

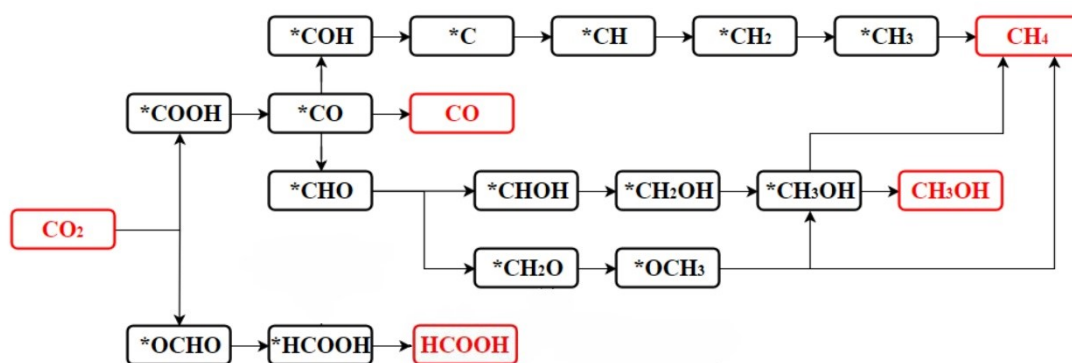

Figure S3. Possible reaction intermediates and pathways of CRR for producing  $\text{HCOOH}$ ,  $\text{CH}_4$ ,  $\text{CH}_3\text{OH}$  and  $\text{CO}$ .

|                 | $\text{*CO}$                                                                                                             | $\text{*HCOOH}$                                                                                                          | $\text{*CH}_2\text{O}$                                                                                                   | $\text{*CH}_3\text{OH}$                                                                                                    | $\text{*CH}_4$                                                                                                            |
|-----------------|--------------------------------------------------------------------------------------------------------------------------|--------------------------------------------------------------------------------------------------------------------------|--------------------------------------------------------------------------------------------------------------------------|----------------------------------------------------------------------------------------------------------------------------|---------------------------------------------------------------------------------------------------------------------------|
| <b>Cu doped</b> | 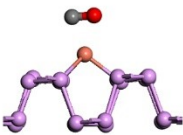<br>$E_{\text{ads}} = -0.95 \text{ eV}$ | <br>$E_{\text{ads}} = -0.44 \text{ eV}$ | <br>$E_{\text{ads}} = -0.92 \text{ eV}$ | <br>$E_{\text{ads}} = -0.49 \text{ eV}$ | <br>$E_{\text{ads}} = 0.01 \text{ eV}$ |
| <b>pristine</b> | <br>$E_{\text{ads}} = 0.14 \text{ eV}$  | <br>$E_{\text{ads}} = -0.07 \text{ eV}$ | <br>$E_{\text{ads}} = -0.48 \text{ eV}$ | <br>$E_{\text{ads}} = 0.11 \text{ eV}$  | <br>$E_{\text{ads}} = 0.21 \text{ eV}$ |

Figure S4. Summary of the adsorption energy ( $E_{\text{ads}}$ ) and configurations of possible reaction intermediates on pristine and Cu-doped phosphorene explored by this study.

Table S1. The adsorption energy ( $E_{\text{ads}}$ ) of Cu atom on phosphorene with different initial adsorbed site (See Figure S1).

|                            | hollow | bridge | top   |
|----------------------------|--------|--------|-------|
| $E_{\text{ads}}/\text{eV}$ | -2.77  | -2.77  | -1.75 |
| Distance/ $\text{\AA}$     | 0.03   | 0.03   | 0.03  |
